# Supplementary material
Source: PubMed Central journal article supplement (PMC5849529)
Supplement: NIHMS941590-supplement-Supplementary_material.pdf [file NIHMS941590-supplement-Supplementary_material.pdf]

1  
2  
3  
4  
5  
6  
7  
8  
9  
10  
11  
12  
13  
14  
15  
16

**SUPPLEMENTARY MATERIAL**

**Evaluation of a national data set for insights into sources, composition,  
and concentrations of per- and polyfluoroalkyl substances (PFASs) in U.S.  
drinking water**

Jennifer L. Guelfo<sup>a\*</sup> and David T. Adamson<sup>b</sup>

<sup>a</sup>School of Engineering, Brown University, Providence, RI, USA, <sup>b</sup>GSI  
Environmental Inc., Houston, Texas USA

\* Brown University School of Engineering, 184 Hope Street, Box D, Providence,  
RI 02912. Email: [jennifer\\_guelfo@brown.edu](mailto:jennifer_guelfo@brown.edu).

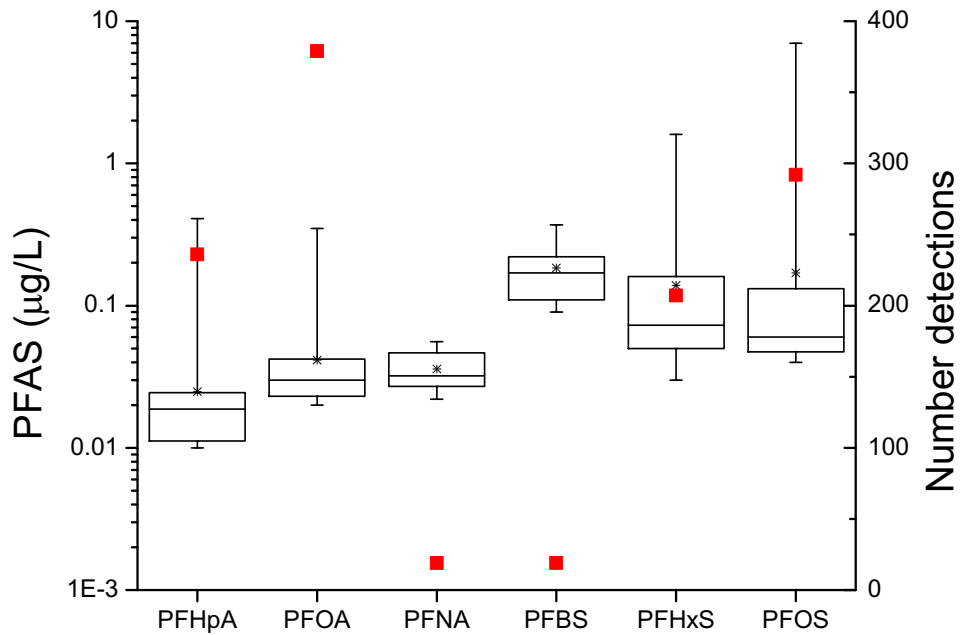

17  
 18 **Figure S.1.** Concentrations of each UCMR3 PFAS analyzed (left y-axis) and total  
 19 number of detections (right y-axis). The lower and upper ends of the whisker  
 20 represent minimum and maximum detections, respectively. Asterisks represent  
 21 the average value. Lower and upper ends of the box represent the 25<sup>th</sup> and 75<sup>th</sup>  
 22 percentile, respectively, and the center line is the median value. Red squares  
 23 represent the number of detections per compound and correspond to the right-  
 24 hand y-axis.

25  
 26  
 27  
 28  
 29  
 30  
 31  
 32  
 33  
 34  
 35  
 36  
 37  
 38  
 39

40 **Table S.1.** PFAS Co-Occurrence Matrix

|                                                                                 | PFOS        | PFOA        | PFHxS      | PFHpA       | PFBS       | PFNA        |
|---------------------------------------------------------------------------------|-------------|-------------|------------|-------------|------------|-------------|
| <b><i>Odds Ratio for Association with Other PFAS</i></b>                        |             |             |            |             |            |             |
| PFOS                                                                            | --          | <b>216</b>  | <b>876</b> | <b>295</b>  | <b>371</b> | <b>46</b>   |
| PFOA                                                                            | <b>216</b>  | --          | <b>242</b> | <b>407</b>  | <b>538</b> | <b>57</b>   |
| PFHxS                                                                           | <b>876</b>  | <b>242</b>  | --         | <b>389</b>  | <b>107</b> | <b>65</b>   |
| PFHpA                                                                           | <b>295</b>  | <b>407</b>  | <b>389</b> | --          | <b>463</b> | <b>94</b>   |
| PFBS                                                                            | <b>371</b>  | <b>538</b>  | <b>107</b> | <b>463</b>  | --         | 0           |
| PFNA                                                                            | <b>46</b>   | <b>57</b>   | <b>65</b>  | <b>94</b>   | 0          | --          |
| <b><i>Odds Ratio for Association with Other UCMR3 Compounds (Selected)</i></b>  |             |             |            |             |            |             |
| 1,4-Dioxane                                                                     | <b>13.2</b> | <b>14.2</b> | <b>4.0</b> | <b>11.4</b> | <b>8.3</b> | <b>8.3</b>  |
| HCFC-22                                                                         | <b>5.0</b>  | <b>4.5</b>  | <b>3.7</b> | <b>3.0</b>  | 0          | 0           |
| Chromium-6                                                                      | <b>2.9</b>  | <b>4.1</b>  | <b>2.2</b> | <b>2.6</b>  | -          | 1.2         |
| 1,2,3-TCP                                                                       | 0           | 0           | 0          | 0           | 0          | 0           |
| <b><i>Odds Ratio for Association with Groundwater (vs. Surface Water)</i></b>   |             |             |            |             |            |             |
| Groundwater                                                                     | <b>2.1</b>  | <b>1.8</b>  | <b>4.1</b> | 1.0         | <b>0.4</b> | <b>11.6</b> |
| <b><i>Odds Ratio for Association with Large Systems (vs. Small Systems)</i></b> |             |             |            |             |            |             |
| Large Systems                                                                   | <b>4.7</b>  | <b>9.2</b>  | <b>5.0</b> | <b>5.7</b>  | -          | 1.7         |

41 Notes: (1) Reflects results of categorical analysis (chi square) on all samples collected during UCMR3 (i.e.,  
 42 not segregated by PWS where sample was collected); (2) All relationships in **bold** were significant based on  
 43 p-value < 0.05; (3) Odds ratio represents the odds that a detection will occur given a particular condition,  
 44 compared to the odds of that outcome occurring in the absence of that condition.

45  
 46  
 47  
 48  
 49  
 50  
 51

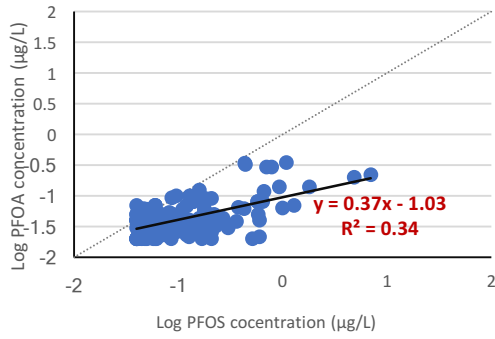

52

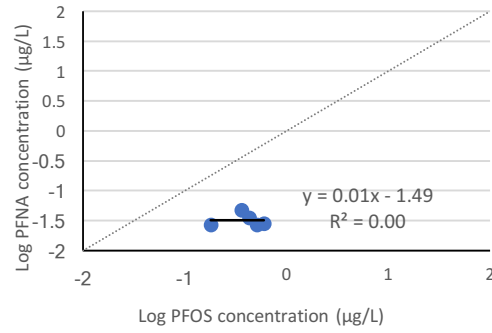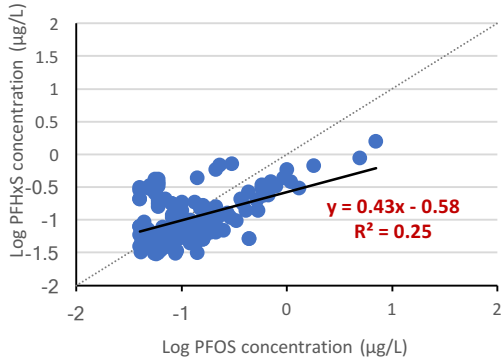

53

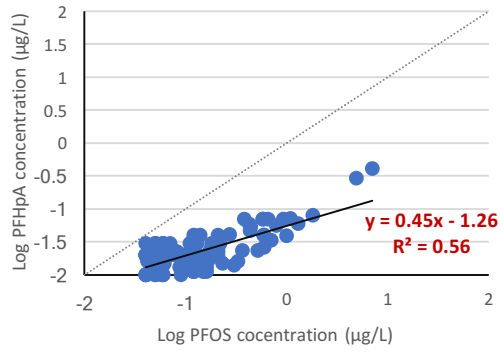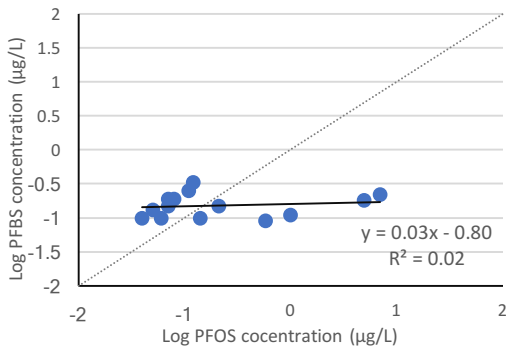

54

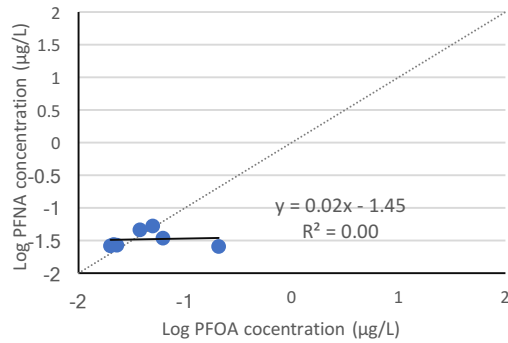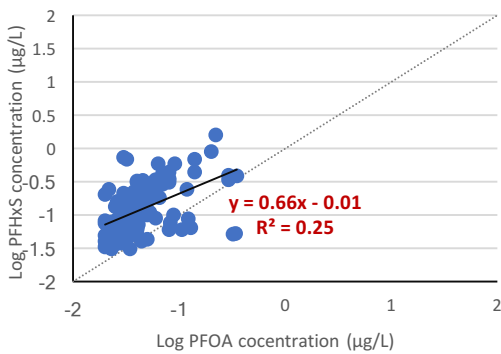

55

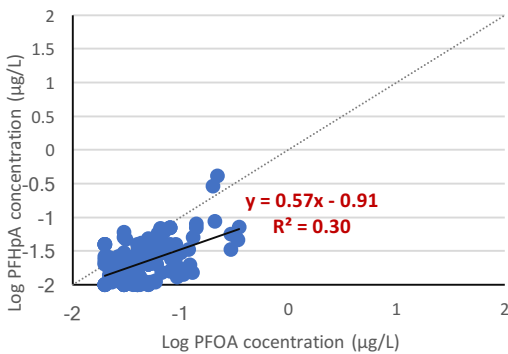

56

57 **Figure S.2.** Concentration cross-plots for all PFASs in UCMR3 that include all  
 58 samples with detections shown relative to a 1 to 1 ratio. Results of linear  
 59 regression are shown for reference purposes, and it should be noted that there  
 60 were no samples with detections of both PFBS and PFNA. Linear regression  
 61 equations and  $R^2$  values shown in red represent slopes statistically different from  
 62 zero ( $p < 0.05$ )

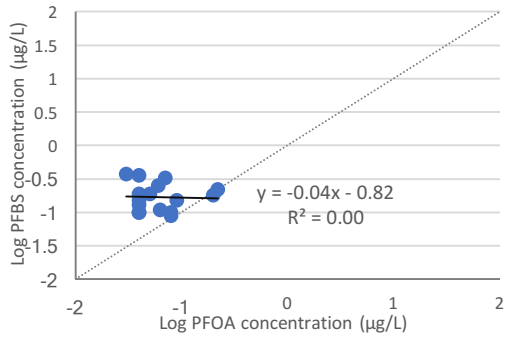

63

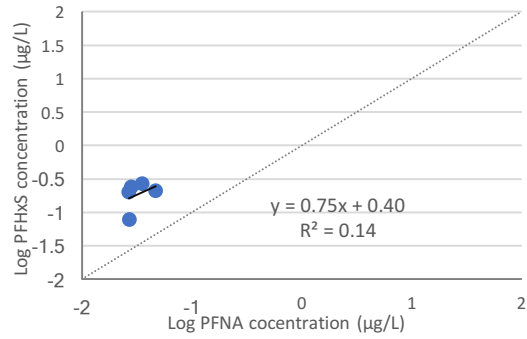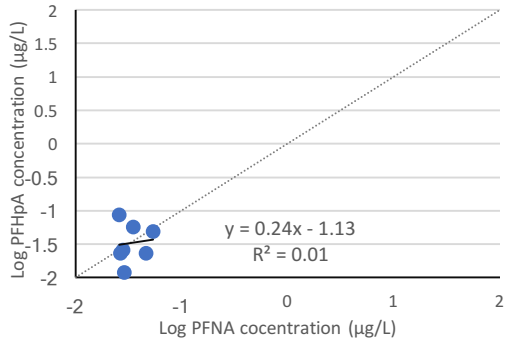

64

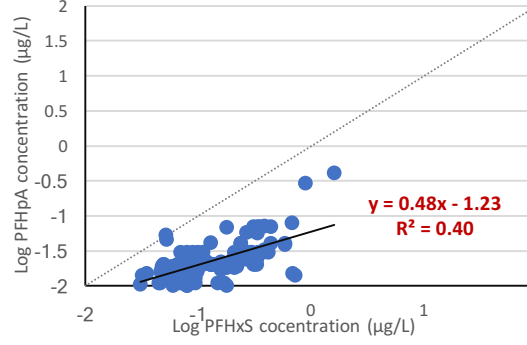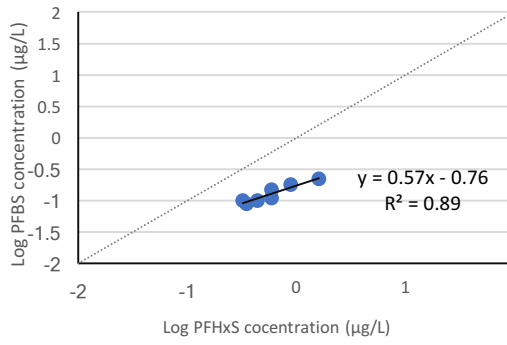

65

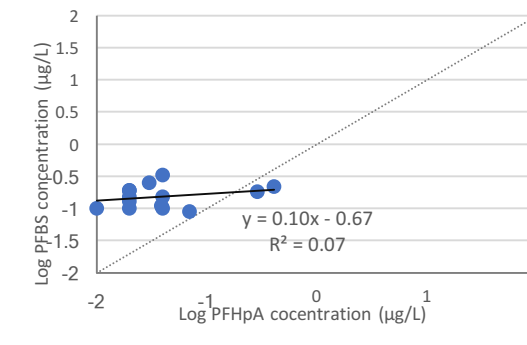

66

67 **Figure S.2 (continued).** Concentration cross-plots for all PFASs in UCMR3 that  
 68 include all samples with detections shown relative to a 1:1 ratio. Results of linear  
 69 regression are shown for reference purposes, and it should be noted that there  
 70 were no samples with detections of both PFBS and PFNA. Linear regression  
 71 equations and  $R^2$  values shown in red represent slopes statistically different from  
 72 zero ( $p < 0.05$ )

73

74

75

76

77

78

79

80

81

82

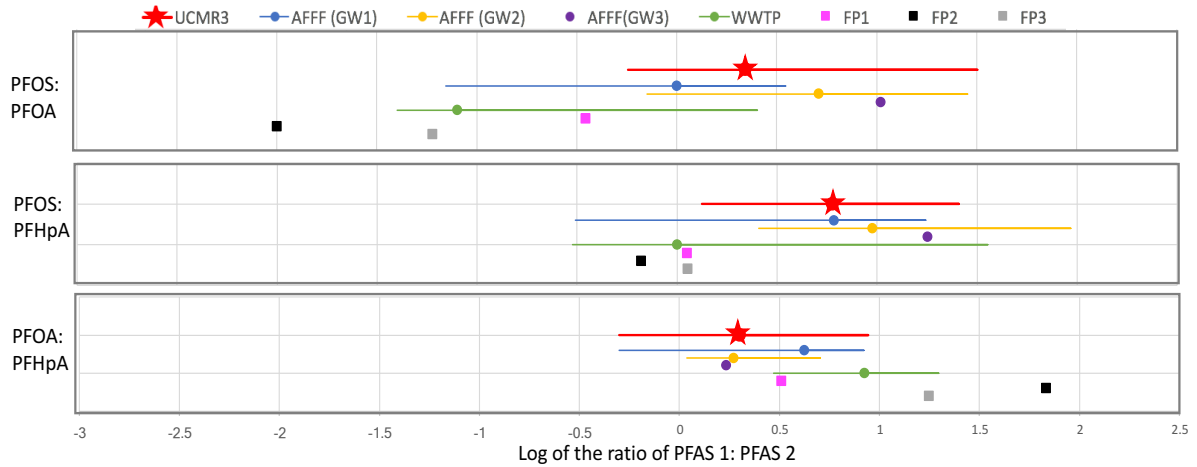

83  
 84  
 85  
 86  
 87  
 88  
 89  
 90  
 91  
 92  
 93  
 94  
 95  
 96  
 97

**Figure S.3.** Logs of ratios of PFOS:PFOA, PFOS:PFHpA, and PFOA:PFHpA compared to ratios in previous studies. Lines represent the range of ratio values (where available) and circles denote median values. Squares denote ratios of maximum groundwater concentrations for sites where ranges were not reported. Sources types are AFFF-impacted groundwater (AFFF (GW)) (Anderson et al. 2016; Houtz et al. 2013; Hull et al. 2017), wastewater treatment plant effluent (WWTP) (Ahrens et al. 2009), and fluoropolymer manufacturing (FP) (Bach et al. 2017; Dauchy et al. 2012; Oliaei et al. 2013).

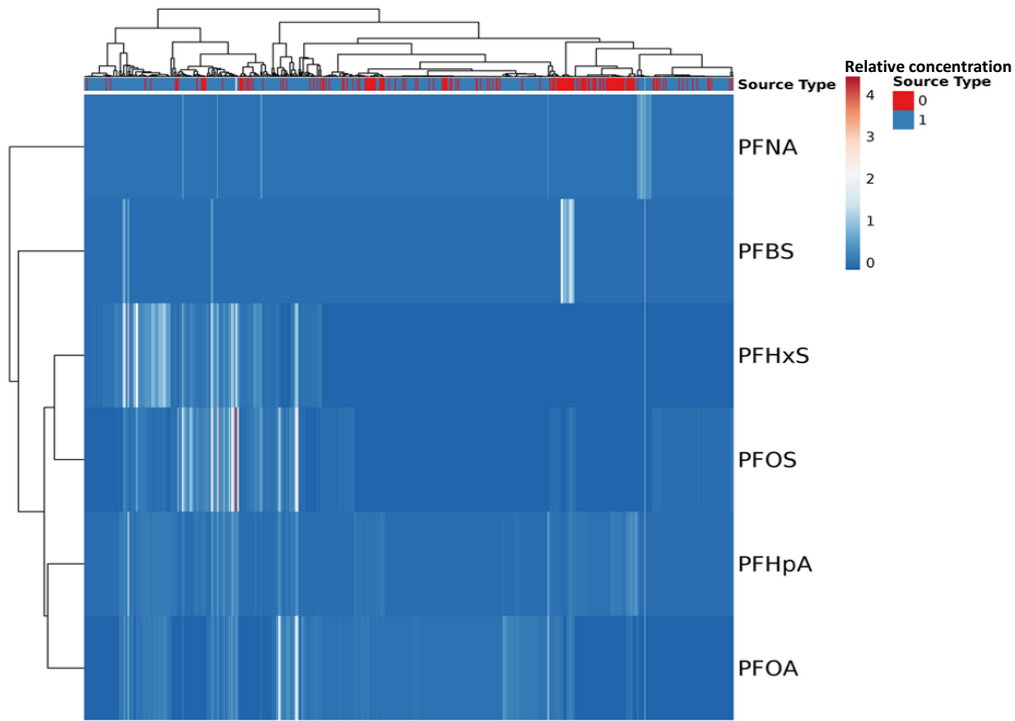

98

99 **Figure S.4.** Results of hierarchical cluster analysis using PFAS concentration  
 100 data. Columns display log normalized concentrations of individual samples.  
 101 Source type is either surface water (0; red) or groundwater (1; blue). Clustering  
 102 of compounds is shown vertically; clustering of samples is shown across the top  
 103 horizontally. Relative concentration levels are reflected in the heat map for each  
 104 PFAS.

105

106

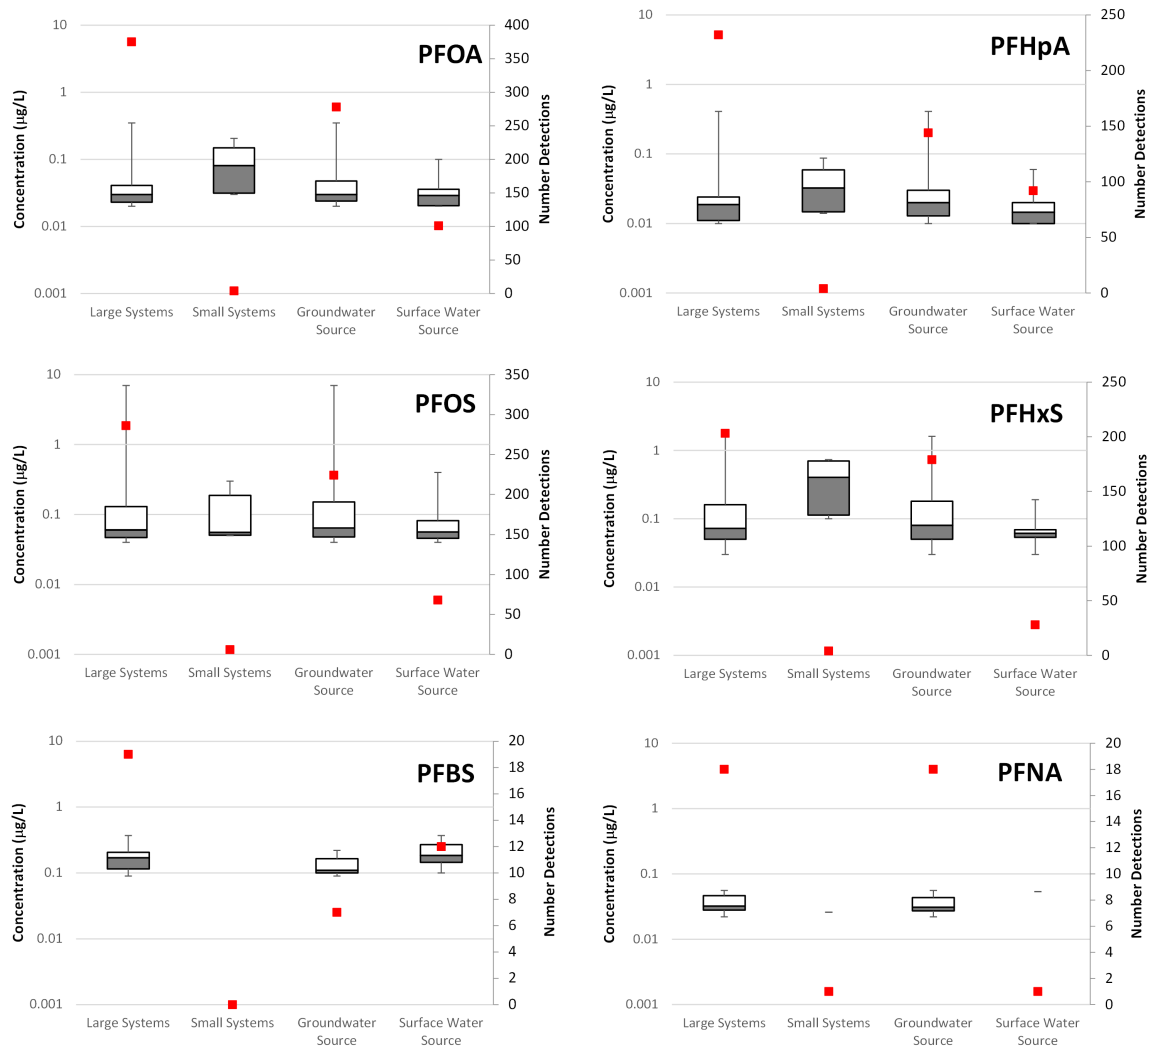

107

108 **Figure S.5.** Concentration of individual PFASs as function of system size and  
 109 source water (box and whisker, left axis) and the number of detections in each  
 110 category (red squares, right axis). Includes all samples with detections of one of  
 111 more PFAS.  
 112

113

114

115

116

117



118

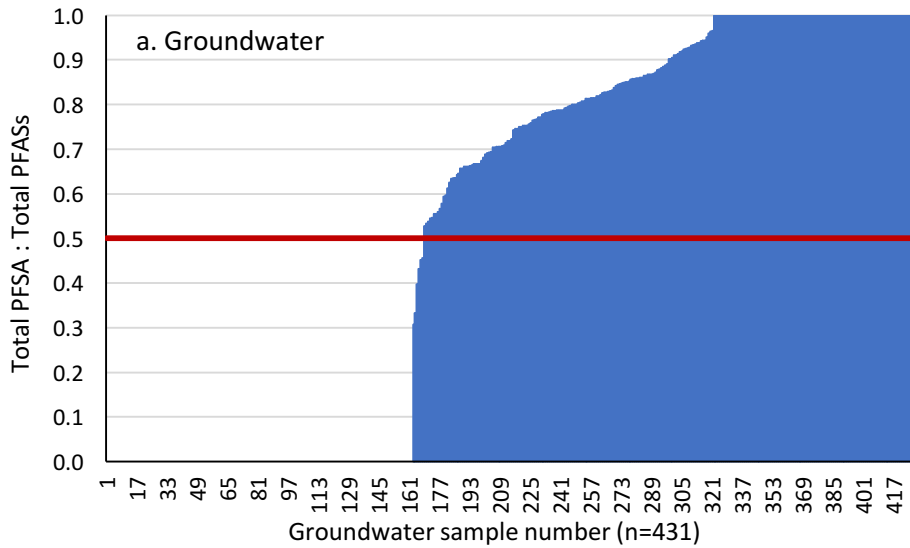

119

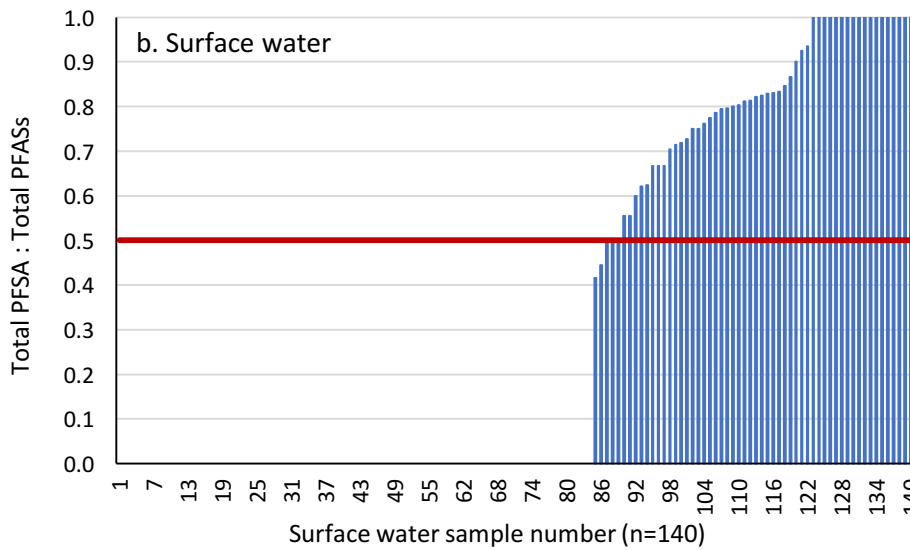

120

121

122 **Figure S.6.** Influence of source water type on the composition of perfluoroalkyl  
123 sulfonates (PFASs) in UCMR3 samples. Each sample with detections was  
124 assigned an arbitrary sample number (x-axis) and the ratio of total PFASs  
125 (PFOS+PFHxS+PFBS) to total PFASs (sum of all 6 UCMR3 PFASs) was plotted  
126 on the y-axis. Samples with a ratio of 0 contained PFASs but no PFASs (i.e.  
127 they were comprised of 100% perfluoroalkyl carboxylates). Samples with ratios  
128 greater than the red line are dominated by PFASs (i.e. ratio of PFSA to PFASs  
129 exceeds 0.5).

130

131

132 **S.1 Aggregation of data for temporal analysis.** To investigate temporal trends,  
133 sample data from all PWSs was aggregated and concentrations over time were  
134 plotted for individual PFASs. Aggregation was necessary because individual  
135 PWSs generally followed UCMR3-recommended monitoring protocol of 4 quarterly  
136 samples for 1-year, but required samples may have been collected from a different  
137 facility or sampling points within the system in each quarter. This limited the  
138 number of data points and duration of the monitoring period, such that establishing  
139 trends at the facility- or PWS-level was not possible. Linear regression was used  
140 on the compound-specific aggregated dataset to determine if there was a temporal  
141 concentration trend. For each PFAS, there was a high degree of variability, and  
142 the resulting mix of slopes of regression lines were modest and included both  
143 increasing and decreasing trends (data not shown).

144

145

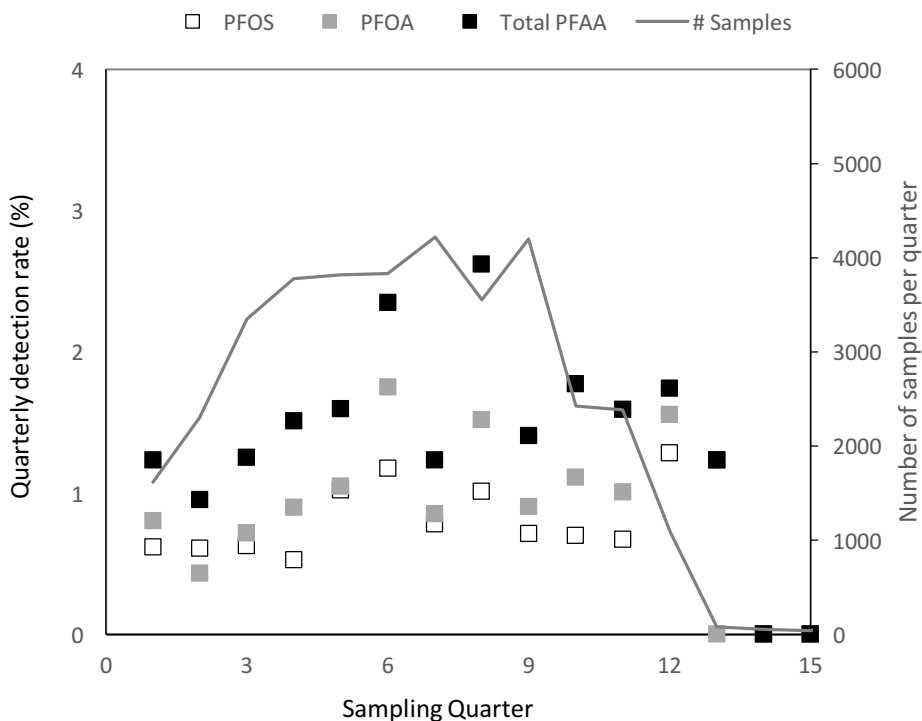

146

147 **Figure S.7.** PFAS, PFOA, and PFOS Occurrence Trend Using Quarterly Results  
 148 for All Samples. Data from all UCMR3 samples with analysis of one or more  
 149 PFAS were grouped by monitoring period (quarterly). The Mann-Kendall test  
 150 was used to evaluate the trend in detection frequency for data from the first 12  
 151 quarters (2013-2015). Data from the last 4 quarters (2016) were not used due to  
 152 the low number of samples per quarter (<2% of total). Squares are detection  
 153 rates and correspond to the left y-axis; lines are the number of samples per  
 154 quarter and correspond to the right y-axis.

155

156

157 **S.2 Transience in PFAS detections.** Given that PFASs included in UCMR3 were

158 all perfluoroalkyl substances, the assumption was that for a specific PWS with a

159 detection of a certain PFAS, the PWS in question would routinely detect that PFAS

160 in all samples collected during UCMR3 monitoring. Instead, individual PFASs

161 frequently were only detected in a single sample from a PWS (**Figure S.8**). The

162 percentage varied widely depending on the PFAS analyzed, ranging from 15% for

163 PFHxS to 64% for PFNA. A portion of this is explained by the fact that many PWSs  
164 sampled multiple different facilities during UCMR3. However, the lack of  
165 consistent PFAS detection across all facilities associated with a PWS also  
166 highlights the unexpectedly sporadic nature of many of these PFAS detections. In  
167 some cases, this can likely be attributed to analytical variability, particularly for  
168 concentrations that approach the MRL. Impacts of analytical variability and the  
169 MRL are discussed in Section 4. However, sporadic detections may also be  
170 attributable to release histories, PFAS fate and transport characteristics, and/or  
171 hydrogeologic characteristics of the source aquifer or surface water body.  
172 Uncertainty regarding the causes of this variation is an important knowledge gap,  
173 especially in a regulatory capacity since it may inform the sampling approaches,  
174 risk evaluation, and mitigation measures required to obtain data that fully represent  
175 PFAS exposures in drinking water.

176

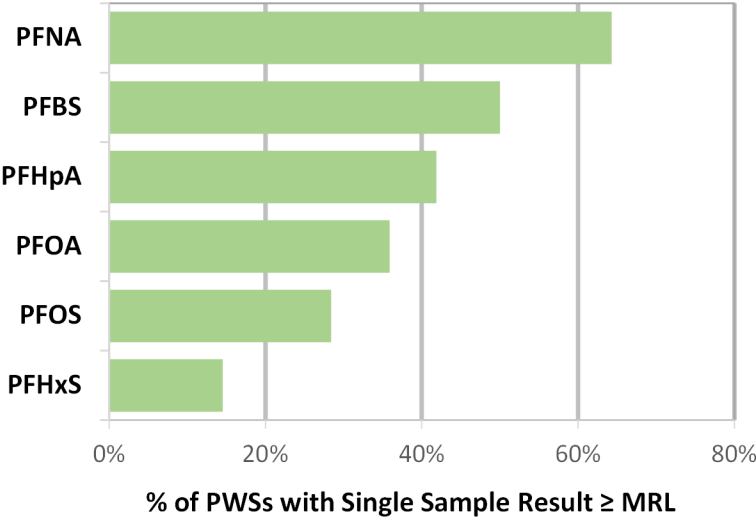

177

178 **Figure S.8.** Percentages of public water systems with single sample detections of  
179 PFASs.

180 **References Cited**

181 Ahrens L, Felizeter S, Sturm R, Xie Z, Ebinghaus R. 2009. Polyfluorinated compounds in  
182 waste water treatment plant effluents and surface waters along the River Elbe,  
183 Germany. *Mar. Pollut. Bull.* 58:1326–1333; doi:10.1016/j.marpolbul.2009.04.028.

184 Anderson RH, Long GC, Porter RC, Anderson JK. 2016. Occurrence of select  
185 perfluoroalkyl substances at U.S. Air Force aqueous film-forming foam release sites  
186 other than fire-training areas: Field-validation of critical fate and transport properties.  
187 *Chemosphere* 150:678–685; doi:10.1016/j.chemosphere.2016.01.014.

188 Bach C, Dauchy X, Boiteux V, Colin A, Hemard J, Sagres V, et al. 2017. The impact of  
189 two fluoropolymer manufacturing facilities on downstream contamination of a river and  
190 drinking water resources with per- and polyfluoroalkyl substances. *Environ. Sci. Pollut.*  
191 *Res.* 24:4916–4925; doi:10.1007/s11356-016-8243-3.

192 Dauchy X, Boiteux V, Rosin C, Munoz J-F. 2012. Relationship Between Industrial  
193 Discharges and Contamination of Raw Water Resources by Perfluorinated Compounds.  
194 Part I: Case Study of a Fluoropolymer Manufacturing Plant. *Bull. Environ. Contam.*  
195 *Toxicol.* 89:525–530; doi:10.1007/s00128-012-0704-x.

196 Houtz EF, Higgins CP, Field JA, Sedlak DL. 2013. Persistence of Perfluoroalkyl Acid  
197 Precursors in AFFF-Impacted Groundwater and Soil. *Environ. Sci. Technol.* 47:8187–  
198 8195; doi:10.1021/es4018877.

199 Hull R, Barber LB, LeBlanc DR, Weber AK, Vecitis CD. 2017. Poly- and perfluoroalkyl  
200 substances in contaminated groundwater, Cape Cod, Massachusetts, 2014-2016.

201 Oliaei F, Kriens D, Weber R, Watson A. 2013. PFOS and PFC releases and associated  
202 pollution from a PFC production plant in Minnesota (USA). *Environ. Sci. Pollut. Res.*  
203 20:1977–1992; doi:10.1007/s11356-012-1275-4.

204
